# Supplementary material
Source: publisher site journal article supplement (https://www.dovepress.com/article/352760)
Supplement: Supplementary file 1 [file get_supplementary_file.php]

**Supplemental Methods**

**Preparation of CAR T cells**

Lymphocytes were obtained from the patient through lymphocyte apheresis under protocols approved by the Ethic Committee of Tongji Hospital, Tongji Medical College, Huazhong University of Science and Technology, Wuhan, China. Written informed consent was obtained from the patient, in accordance with the Declaration of Helsinki. Peripheral blood mononuclear cells (PBMCs) were obtained using lymphocyte separation solution by the density gradient centrifugation at 700 g for 20 min. CD3+ T cells were isolated from the PBMCs by magnetic bead-conjugated anti-CD3 antibody (MiltenyiBiotec) and stimulated with anti-CD3/ anti-CD28 monoclonal antibody-coated magnetic beads（Thermo Fisher 11132D）in modified CTS™ OpTmizer™ T-Cell Expansion SFM (Thermo Fisher A10221-01) at 37 °C, 5% CO2 for 18-24 h. Cells were then separately transduced with different lentiviral CAR vectors, and cultured for 10-14 days in vitro. The medium was renewed every 2-3 days and cell concentration was adjusted to 1.5-2.0×10^6 /ml. The transduction efficiency and tumor cytotoxic effects of CAR T cells were monitored prior to infusion.

**Phenotypic analysis by flow cytometry**

Bone marrow mononuclear cells were stained with the following fluorescently-labeled monoclonal antibodies: BV421 anti-CD19 (Biolegend), PE-CY7 anti-CD10 (BDIS), Percp5.5 anti-CD34 (BDIS), Percp5.5 anti-CD38 (BD Pharmingen), V500 anti-CD45 (BDIS), PE anti-CD79b (Biolegend), PE anti-CD79a (BDIS), APC anti-CD22 (BDIS), FITC anti-TdT (Dako) and FITC anti-Igκ/Igλ (Dako). For intracellular proteins (CD79a) analysis, permeabilization process should be performed.

**Copy number calculation of CAR**

Genomic DNA of peripheral blood mononuclear cells was isolated. Absolute quantification of CAR gene copy number per microgramme genomic DNA was determined by ddPCR before and after infusion of CAR T cells. The sequences of the primers and probes were listed in supplementary table 1.

Supplementary table 1. Sequences of primers used in ddPCR

| CAR22 Forward | CTGCCGCGCCAGTCA |
| --- | --- |
| Reverse | CGGGCCGTTGCTGGTA |
| Probe | ACCATCTGGTCTTATCTG |
| CAR19 Forward | CCGGCTGACCATCATCAAG |
| Reverse | GGTCTGCAGGCTGTTCATCTT |
| Probe | CAACAGCAAGAGCCAGG |
